# Supplementary material for: Synthesis of Pyrazolone Derivatives and Their Nanometer Ag(I) Complexes and Physicochemical, DNA Binding, Antitumor, and Theoretical Implementations
Source: Hindawi journal article supplement (doi:10.1155/2018/2727619), 2018-01-01
Supplement: f1 [file 2727619.f1.pdf]

**TABLE 1S:** Characteristic IR spectral bands (cm<sup>-1</sup>) for Ag(I)- pyrazolone (HL<sup>1-4</sup>) complexes

| Compounds                                                                   | $\nu_{asNH_2}, \nu_{sNH_2}, \nu_{OH}$ | $\nu_{NH_2}$ | $\nu_{C=O}$ | $\nu_{(C=N)s}$ | $\delta_{NH_2}$ | $\delta_{NH_2}$ | $\nu(NO_3)(ion)$ | $\nu_{M-N}$ |
|-----------------------------------------------------------------------------|---------------------------------------|--------------|-------------|----------------|-----------------|-----------------|------------------|-------------|
| 1) HL <sup>1</sup>                                                          | 3410,3333                             | 3184, 3160   | 1671        | 1586, 1565     | 1625            | 1493, 1442      | -----            | ----        |
| 2) [Ag (HL <sup>1</sup> ) <sub>2</sub> ](NO <sub>3</sub> )                  | 3319, 3247                            | 3191         | 1671        | 1570, 1566     | 1595            | 1494,1420       | 1380             | 530         |
| 3) HL <sup>2</sup>                                                          | 3420, 3330                            | 3195, 3180   | 1663        | 1599           | 1644            | 1522, 1488      | -----            | ----        |
| 4) [Ag (HL <sup>2</sup> ) <sub>2</sub> ](NO <sub>3</sub> )                  | 3400, 3327                            | 3205, 3192   | 1683        | 1591, 1583     | 1630            | 1487,           | 1381             | 560         |
| 5) HL <sup>3</sup>                                                          | 3380, 3335                            | 3190, 3177   | 1667        | 1559,1530      | 1633            | 1505, 1464      | -----            | ----        |
| 6) [Ag (HL <sup>3</sup> ) <sub>2</sub> ](NO <sub>3</sub> )2H <sub>2</sub> O | 3410 (B.C),                           | 3181 (B.C)   | 1668        | 1559, 1504     | 1629            | 1505, 1440      | 1384             | 511         |
| 7) HL <sup>4</sup>                                                          | 3456, 3356                            | 3219, 3190   | 1672        | 1589, 1512     | 1637            | 1480, 1470      | -----            | ----        |
| 8) [Ag (HL <sup>4</sup> ) <sub>2</sub> ](NO <sub>3</sub> )                  | 3445, 3338                            | 3197(B)      | 1685        | 1573, 1512     | 1612            | 1470            | 1384             | 509         |

B.C, Broad band centered

**TABLE 2S:** Plausible TGA data for Ag(I)- pyrazolone (HL<sup>1-4</sup>) complexes

| Compound                                                   | Steps           | Temp. range(°C) | Decomposed                                                          | Weight loss; Calcd (Found %) |
|------------------------------------------------------------|-----------------|-----------------|---------------------------------------------------------------------|------------------------------|
| 1) HL <sup>1</sup>                                         | 1 <sup>st</sup> | 150.2 - 250.5   | - NH <sub>3</sub> +CO                                               | 22.17(22.16)                 |
|                                                            | 2 <sup>nd</sup> | 251.1 - 560.2   | - 2NH <sub>3</sub> +2CN                                             | 42.37(42.37)                 |
|                                                            | Residue         |                 | 6C                                                                  | 35.46(35.47)                 |
| 2) [Ag (HL <sup>1</sup> ) <sub>2</sub> ](NO <sub>3</sub> ) | 1 <sup>st</sup> | 155.3 - 280.4   | -NO <sub>2</sub> +H <sub>2</sub> CO <sub>3</sub> +0.5H <sub>2</sub> | 18.92(19.01)                 |
|                                                            | 2 <sup>nd</sup> | 282.3- 571.8    | -C <sub>6</sub> H <sub>6</sub> +3NH <sub>3</sub>                    | 22.42(22.38)                 |
|                                                            | 3 <sup>rd</sup> | 572.0 - 770.2   | -4CN                                                                | 18.06(18.06)                 |
|                                                            | Residue         |                 | 7C + AgN <sub>3</sub>                                               | 40.60(40.55)                 |

|                                                                 |                 |               |                                                           |              |
|-----------------------------------------------------------------|-----------------|---------------|-----------------------------------------------------------|--------------|
| 3) $\text{HL}^2$                                                | 1 <sup>st</sup> | 140.1 - 310.3 | - $\text{NH}_3 + \text{CO} + \text{HCl}$                  | 34.29(34.41) |
|                                                                 | 2 <sup>nd</sup> | 311.2 - 620.4 | - $\text{N}_2\text{H}_4 + 2\text{CN}$                     | 35.38(35.30) |
|                                                                 | Residue         |               | 6C                                                        | 30.33(30.29) |
| 4) $[\text{Ag}(\text{HL}^2)_2](\text{NO}_3)$                    | 1 <sup>st</sup> | 162.1 - 350.1 | - $\text{NO}_2 + \text{C}_2\text{O}_3 + \text{Cl}_2$      | 29.28(29.28) |
|                                                                 | 2 <sup>nd</sup> | 350.2 - 610.1 | - $\text{C}_{12}\text{H}_{10} + \text{NH}_2 + \text{N}_2$ | 30.73(30.76) |
|                                                                 | 3 <sup>rd</sup> | 610.3 - 810.8 | - 4HCN                                                    | 16.76(16.76) |
|                                                                 | Residue         |               | $\text{AgN}_3$                                            | 23.23(23.20) |
| 5) $\text{HL}^3$                                                | 1 <sup>st</sup> | 157.6 - 301.2 | - $\text{NH}_3 + \text{CO} + \text{N}_2$                  | 33.63(33.62) |
|                                                                 | 2 <sup>nd</sup> | 301.2 - 631.7 | - $\text{N}_2\text{H}_4 + \text{CH}_4$                    | 22.14(22.21) |
|                                                                 | Residue         |               | 8C                                                        | 44.23(44.17) |
| 6) $[\text{Ag}(\text{HL}^3)_2](\text{NO}_3)2\text{H}_2\text{O}$ | 1 <sup>st</sup> | 67.8- 158.9   | - $2\text{H}_2\text{O}$                                   | 5.63(5.62)   |
|                                                                 | 2 <sup>nd</sup> | 160.1 - 320.9 | - $\text{NO}_2 + 2\text{CH}_4 + \text{CO}_2 + \text{CO}$  | 23.44(23.45) |
|                                                                 | 3 <sup>rd</sup> | 322.1- 584.5  | - $\text{C}_{12}\text{H}_{10}$                            | 24.08(24.21) |
|                                                                 | 4 <sup>th</sup> | 584.7 - 805.4 | - $4\text{HCN} + 3\text{N}_2$                             | 30.01(29.89) |
|                                                                 | Residue         |               | Ag                                                        | 16.84(16.83) |
| 7) $\text{HL}^4$                                                | 1 <sup>st</sup> | 147.6 - 301.2 | - $\text{NH}_3 + \text{CO} + \text{N}_2$                  | 32.26(32.24) |
|                                                                 | 2 <sup>nd</sup> | 301.2 - 631.7 | - $\text{N}_2\text{H}_4 + \text{CH}_4$                    | 33.87(33.90) |
|                                                                 | Residue         |               | 8C                                                        | 33.87(33.86) |
| 8) $[\text{Ag}(\text{HL}^4)_2](\text{NO}_3)$                    | 1 <sup>st</sup> | 166.1 - 350.5 | - $2\text{NO}_2 + 4\text{HCN} + \text{N}_2$               | 34.24(34.23) |
|                                                                 | 2 <sup>nd</sup> | 350.5- 590.2  | - $\text{N}_2\text{O}_5$                                  | 16.21(16.18) |
|                                                                 | 3 <sup>rd</sup> | 590.3 - 793.8 | - $2\text{C}_6\text{H}_6$                                 | 23.45(23.45) |
|                                                                 | Residue         |               | 2C + $\text{AgN}_3$                                       | 26.10(26.14) |

---

**Table 3S.** Energy parameters (eV) applying DFT method

| Compound                      | E <sub>H</sub> (eV) | E <sub>L</sub> (eV) | (E <sub>H</sub> -<br>E <sub>L</sub> ) (eV) | E <sub>I</sub> -E <sub>H</sub> | x(eV)    | μ(eV)    | η(eV)    | S(eV-1)  | ω(eV)    | σ(eV)       |
|-------------------------------|---------------------|---------------------|--------------------------------------------|--------------------------------|----------|----------|----------|----------|----------|-------------|
| H <sub>2</sub> L <sup>1</sup> | -0.18521            | -0.06966            | -0.1156                                    | 0.11555                        | 0.127435 | -0.12744 | 0.057775 | 0.028888 | 0.140542 | 17.30852445 |
| Ag(I)-HL <sup>1</sup>         | -0.21018            | -0.19055            | -0.0196                                    | 0.01963                        | 0.200365 | -0.20037 | 0.009815 | 0.004908 | 2.045142 | 101.8848701 |
| H <sub>2</sub> L <sup>2</sup> | -0.19022            | -0.07564            | -0.1146                                    | 0.11458                        | 0.13293  | -0.13293 | 0.05729  | 0.028645 | 0.154219 | 17.45505324 |
| Ag(I)-HL <sup>2</sup>         | -0.21571            | -0.19595            | -0.0198                                    | 0.01976                        | 0.20583  | -0.20583 | 0.00988  | 0.00494  | 2.144028 | 101.2145749 |
| H <sub>2</sub> L <sup>3</sup> | -0.18337            | -0.06722            | -0.1162                                    | 0.11615                        | 0.125295 | -0.1253  | 0.058075 | 0.029038 | 0.13516  | 17.21911322 |
| Ag(I)-HL <sup>3</sup>         | -0.19798            | -0.18199            | -0.016                                     | 0.01599                        | 0.189985 | -0.18999 | 0.007995 | 0.003997 | 2.257305 | 125.0781739 |
| H <sub>2</sub> L <sup>4</sup> | -0.18143            | -0.06156            | -0.1199                                    | 0.11987                        | 0.121495 | -0.1215  | 0.059935 | 0.029968 | 0.123142 | 16.6847418  |
| Ag(I)-HL <sup>4</sup>         | -0.21877            | -0.20101            | -0.0178                                    | 0.01776                        | 0.20989  | -0.20989 | 0.00888  | 0.00444  | 2.480507 | 112.6126126 |

**TABLE 4S:** Significant log file data for pyrazolone ligands and their Ag(I) complexes

| Compounds              | N <sup>8</sup> | N <sup>15</sup> | N <sup>36</sup> | N <sup>43</sup> | M         | C <sup>11</sup> -N <sup>15</sup> | C <sup>12</sup> -N <sup>8</sup> | D(Debye) | f      | E(nm)   |
|------------------------|----------------|-----------------|-----------------|-----------------|-----------|----------------------------------|---------------------------------|----------|--------|---------|
| HL <sup>1</sup>        | -0.372663      | -0.810500       | ----            | ----            | ----      | 1.370778                         | 1.290060                        | 2.4597   | 0.0305 | 481.54  |
| Ag(I)- HL <sup>1</sup> | -0.379435      | -0.111566       | -0.358308       | -0.074319       | -0.170741 | ----                             | ----                            | 4.5428   | 0.0259 | 2576.38 |
| HL <sup>2</sup>        | -0.372993      | -0.170822       | ----            | ----            | ----      | 1.370611                         | 1.290075                        | 1.7522   | 0.0307 | 491.48  |
| Ag(I)- HL <sup>2</sup> | -0.382616      | -0.111681       | -0.361115       | -0.072323       | -0.164420 | ----                             | ----                            | 4.5286   | 0.0241 | 2646.8  |
| HL <sup>3</sup>        | -0.373119      | -0.174258       | ----            | ----            | ----      | 1.370975                         | 1.289734                        | 2.8477   | 0.0322 | 477.42  |
| Ag(I)- HL <sup>3</sup> | -0.361510      | -0.131663       | -0.355586       | -0.092131       | -0.259004 | ----                             | ----                            | 2.1739   | 0.0025 | 9548.13 |
| HL <sup>4</sup>        | -0.060119      | -0.064912       | ----            | ----            | ----      | 1.417723                         | 1.334193                        | 5.5760   | 0.0001 | 5479.51 |
| Ag(I)- HL <sup>4</sup> | -0.362551      | -0.143065       | -0.207957       | 0.214036        | -0.189765 | ----                             | ----                            | 1.7655   | 0.0048 | 7279.67 |

**TABLE 5S:** Energy values (k cal/mol) for pyrazolone - protein docked complexes

| ligands         | pKa, pKb | Receptor | Est. free<br>energy of<br>binding | Est. inhibition<br>constant<br>(K <sub>i</sub> )(uM) | vdW+ bond+<br>desolve<br>energy | Electrostatic<br>Energy | Total<br>intercooled<br>Energy | Frequency | Interact<br>surface |
|-----------------|----------|----------|-----------------------------------|------------------------------------------------------|---------------------------------|-------------------------|--------------------------------|-----------|---------------------|
| HL <sup>1</sup> |          | 3s7s     | -6.76                             | 11.06                                                | -7.91                           | -0.04                   | -7.96                          | 80%       | 423.372             |
|                 | 1.58     | 3e1r     | -4.75                             | 330.07                                               | -5.21                           | -0.05                   | -5.26                          | 40%       | 416.009             |
|                 | -0.81    | 4dk7     | -3.88                             | 1.42                                                 | -4.52                           | -0.05                   | -4.57                          | 20%       | 479.222             |
| HL <sup>2</sup> |          | 1bpb     | -5.39                             | 112.83                                               | -5.88                           | -0.02                   | -5.91                          | 50%       | 466.75              |
|                 |          | 3s7s     | -7.89                             | 1.64                                                 | -8.74                           | -0.11                   | -8.85                          | 50%       | 455.857             |
|                 | 2.10     | 3e1r     | -5.29                             | 132.93                                               | -5.75                           | -0.05                   | -5.81                          | 30%       | 435.984             |
|                 | -0.84    | 4dk7     | -4.01                             | 1.14                                                 | -4.53                           | -0.07                   | -4.59                          | 10%       | 506.796             |
| HL <sup>3</sup> |          | 1bpb     | -5.89                             | 47.95                                                | -6.75                           | -0.15                   | -6.89                          | 20%       | 515.286             |
|                 |          | 3s7s     | -7.04                             | 6.89                                                 | -7.86                           | -0.10                   | -7.96                          | 90%       | 456.741             |
|                 | 1.05     | 3e1r     | -4.97                             | 225.74                                               | -5.46                           | -0.02                   | -5.48                          | 50%       | 440.961             |
|                 | -0.80    | 4dk7     | -4.14                             | 917.05                                               | -4.89                           | -0.10                   | -4.99                          | 10%       | 517.815             |
| HL <sup>4</sup> |          | 1bpb     | -5.42                             | 107.22                                               | -6.23                           | -0.17                   | -6.40                          | 50%       | 501.982             |
|                 |          | 3s7s     | -8.27                             | 863.48                                               | -9.44                           | -0.11                   | -9.55                          | 80%       | 461.009             |
|                 | 2.54     | 3e1r     | -5.18                             | 159.40                                               | -5.92                           | -0.04                   | -5.95                          | 30%       | 449.648             |
|                 | -0.85    | 4dk7     | -4.58                             | 437.03                                               | -5.51                           | +0.02                   | -5.49                          | 20%       | 511.913             |
|                 |          | 1bpb     | -6.21                             | 28.20                                                | -7.37                           | -0.17                   | -7.54                          | 40%       | 507.894             |

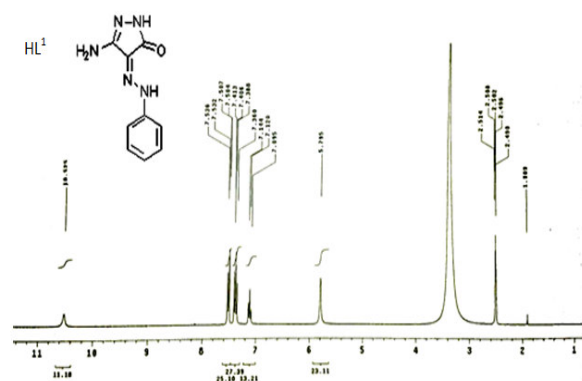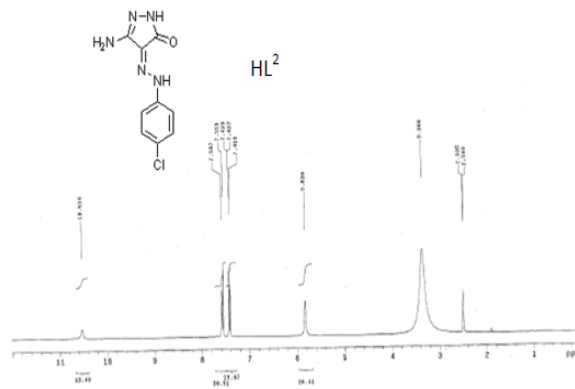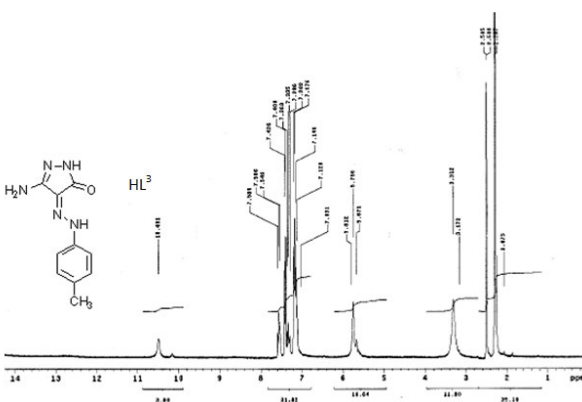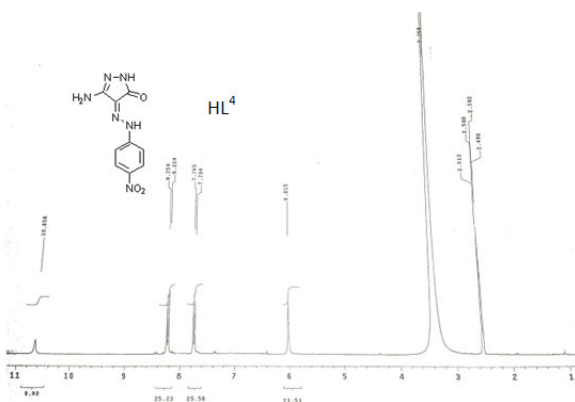

Figure 1S. <sup>1</sup>H NMR spectra of pyrazolone derivatives, HL<sup>(1-4)</sup>

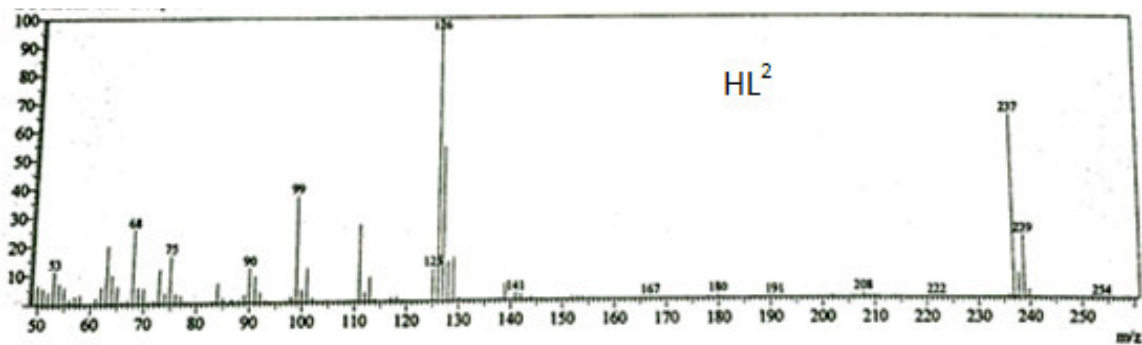

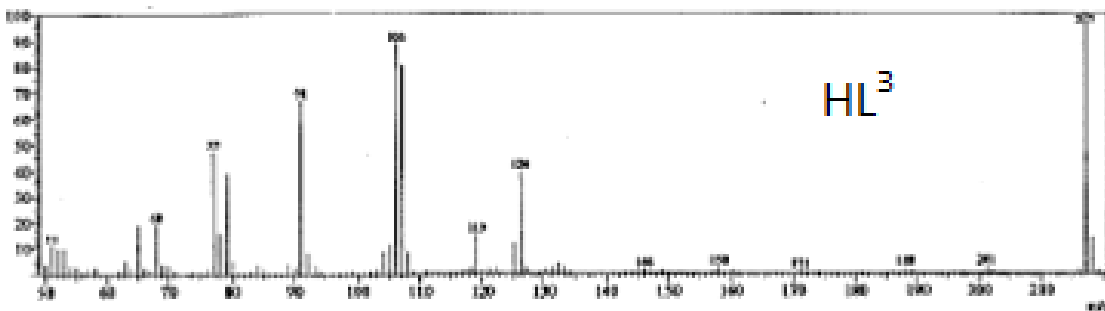

**Figure 2S .** Mass spectra of two elected ligands

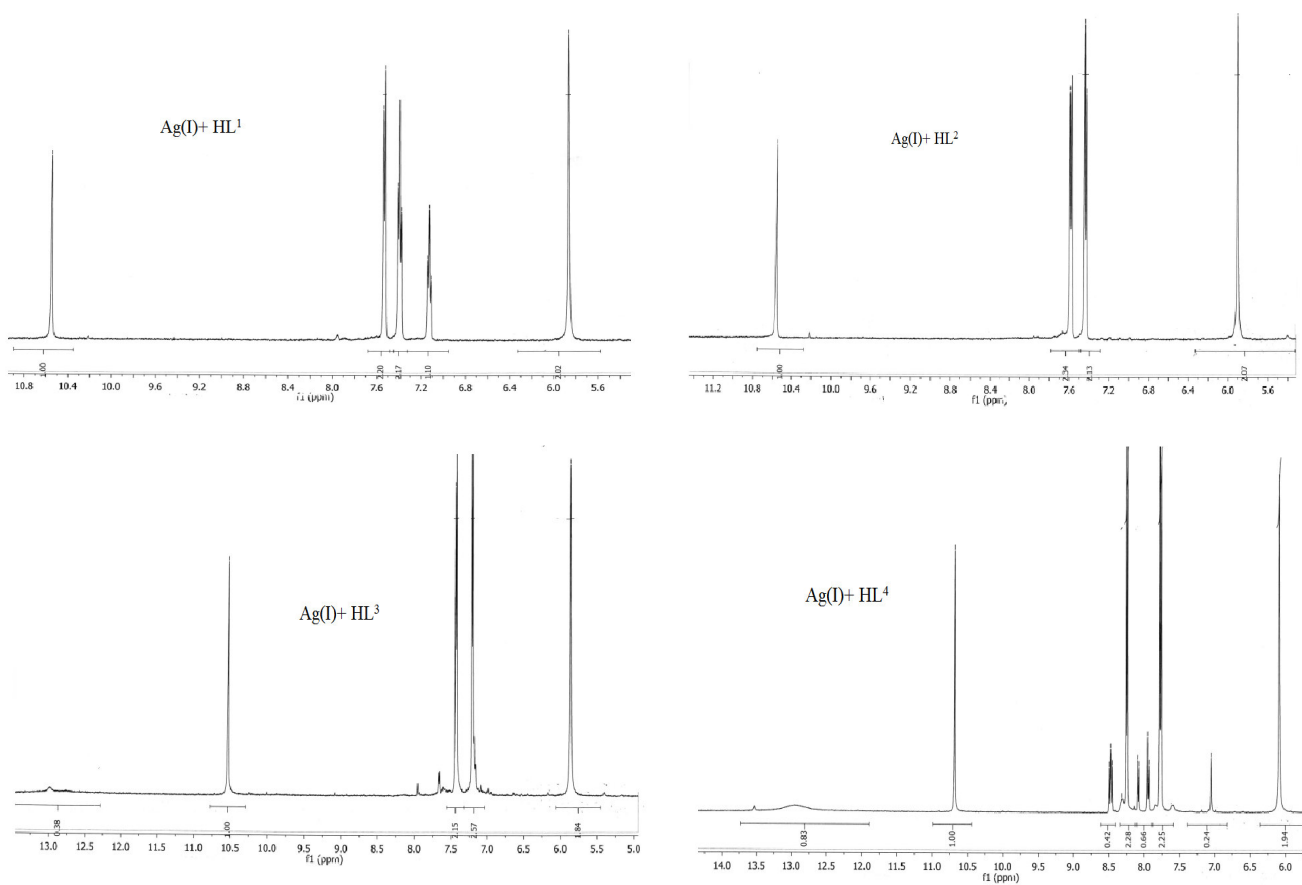

**Figure 3S .** <sup>1</sup>H NMR spectra of three Ag(I)- pyrazolone derivatives

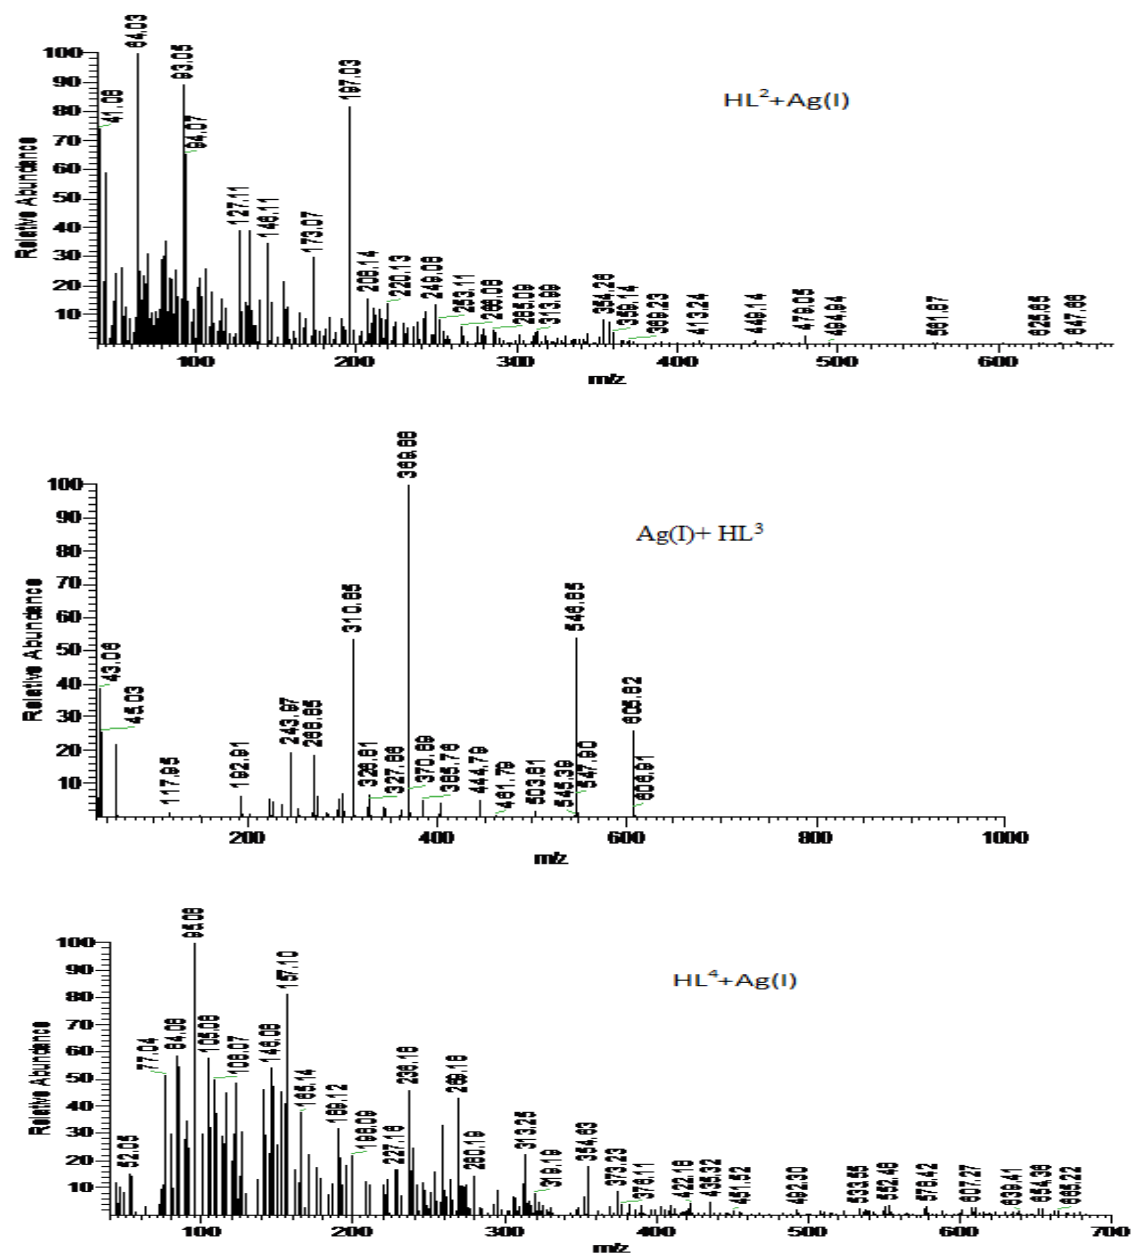

Figure 4S . Mass spectra of selected ligands and three Ag(I) complexes

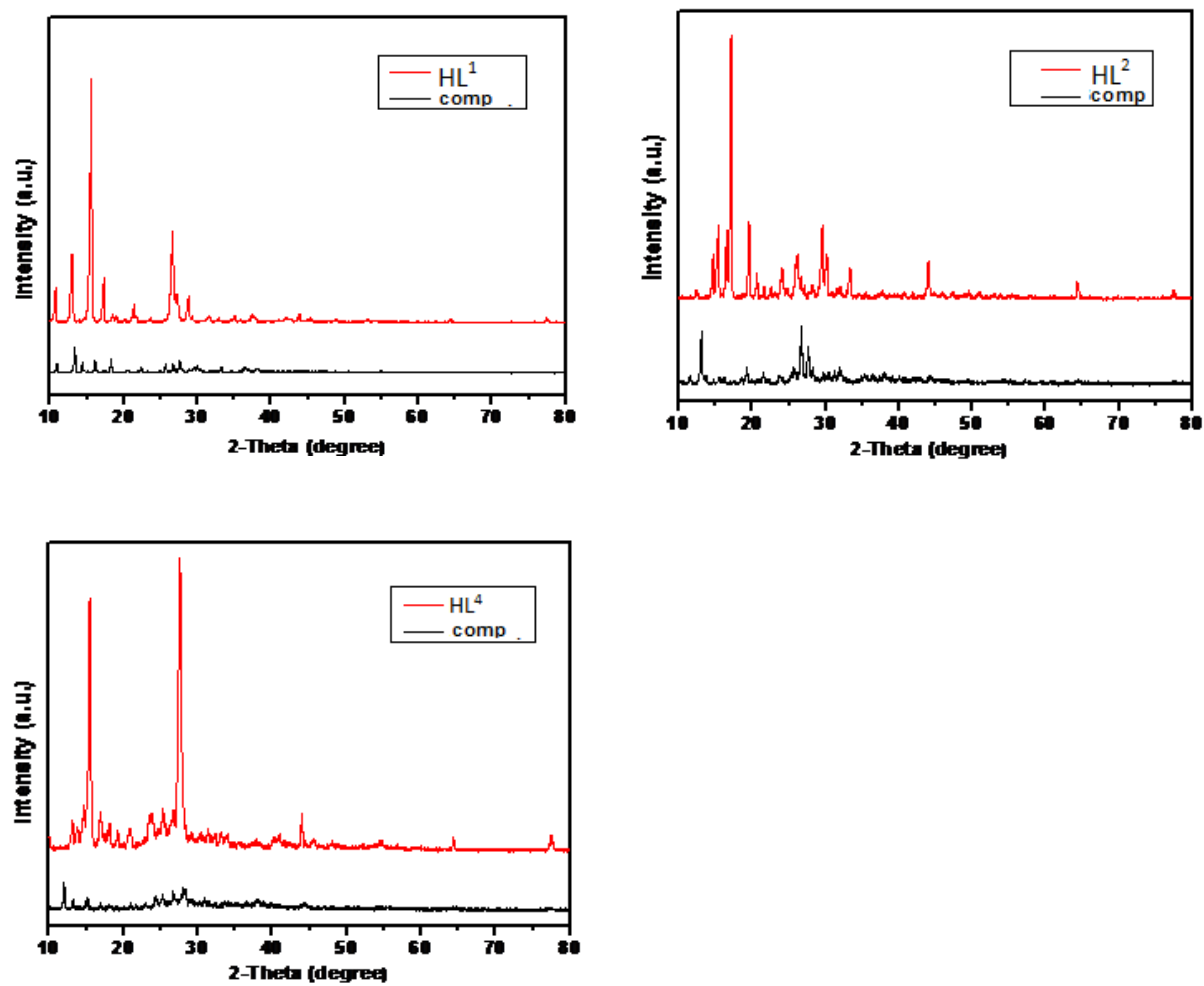

Figure 5 S. X-Ray patterns of three pyrazolone derivatives and their Ag(I) complexes

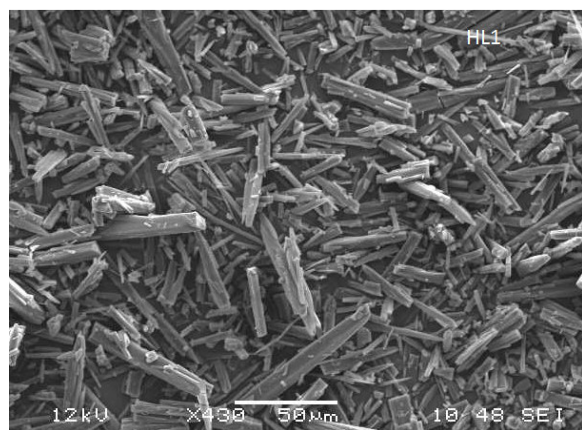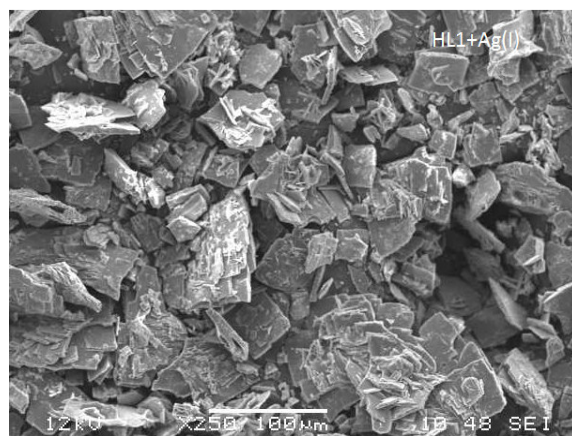



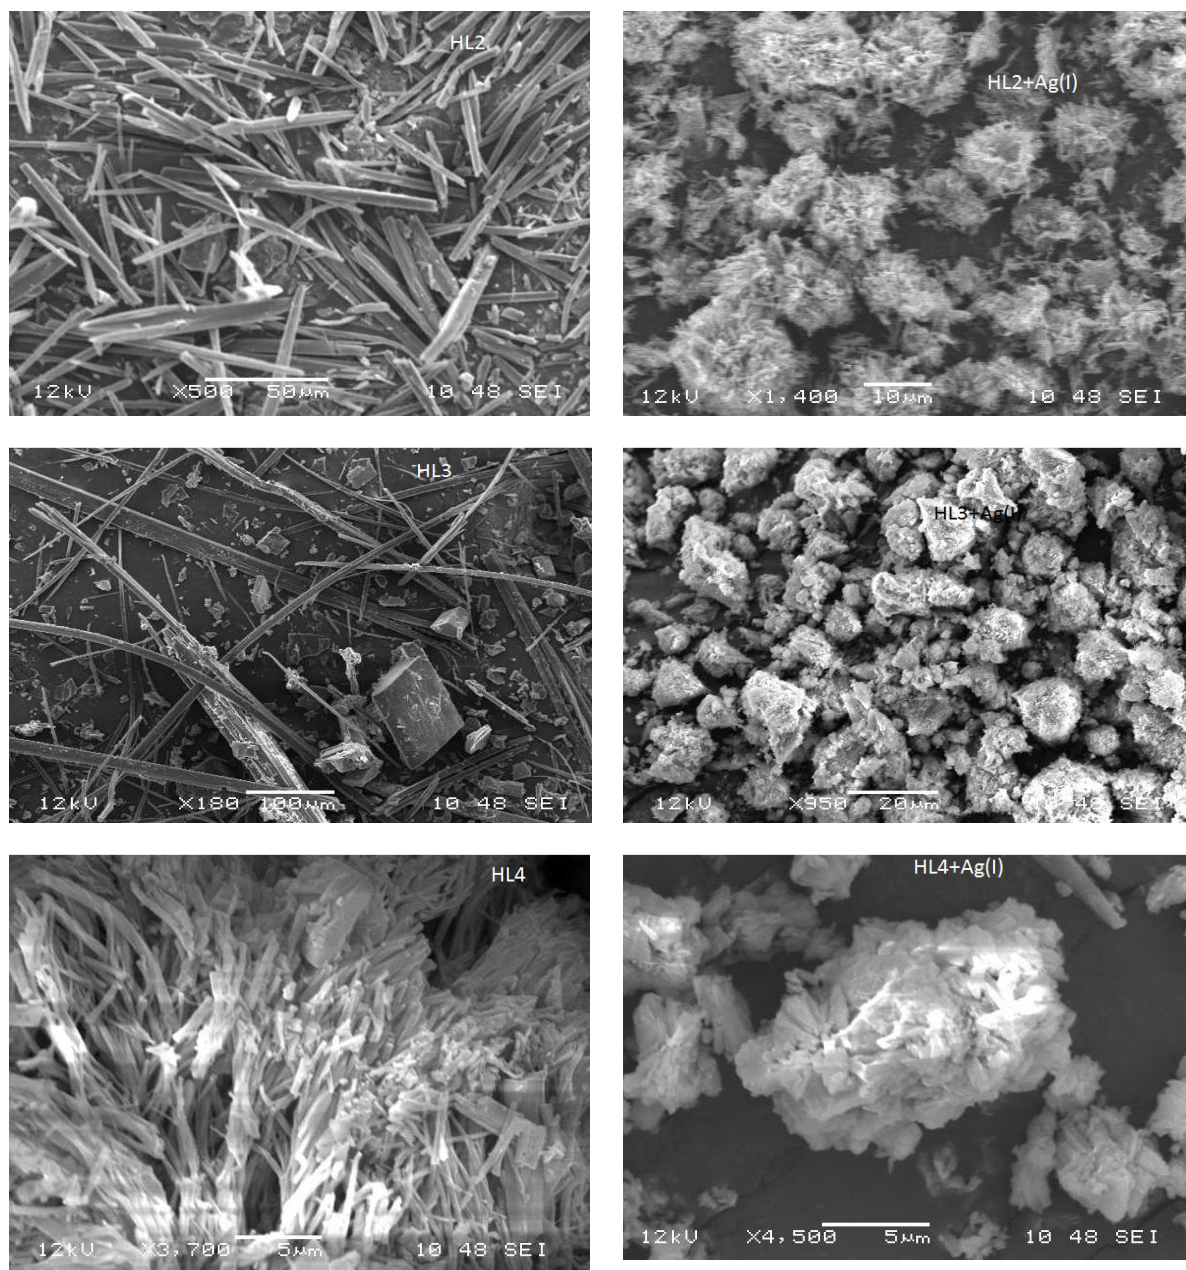

**Figure 6S.** SEM images of pyrazolone derivatives ,HL<sup>(1-4)</sup> and their Ag(I) complexes

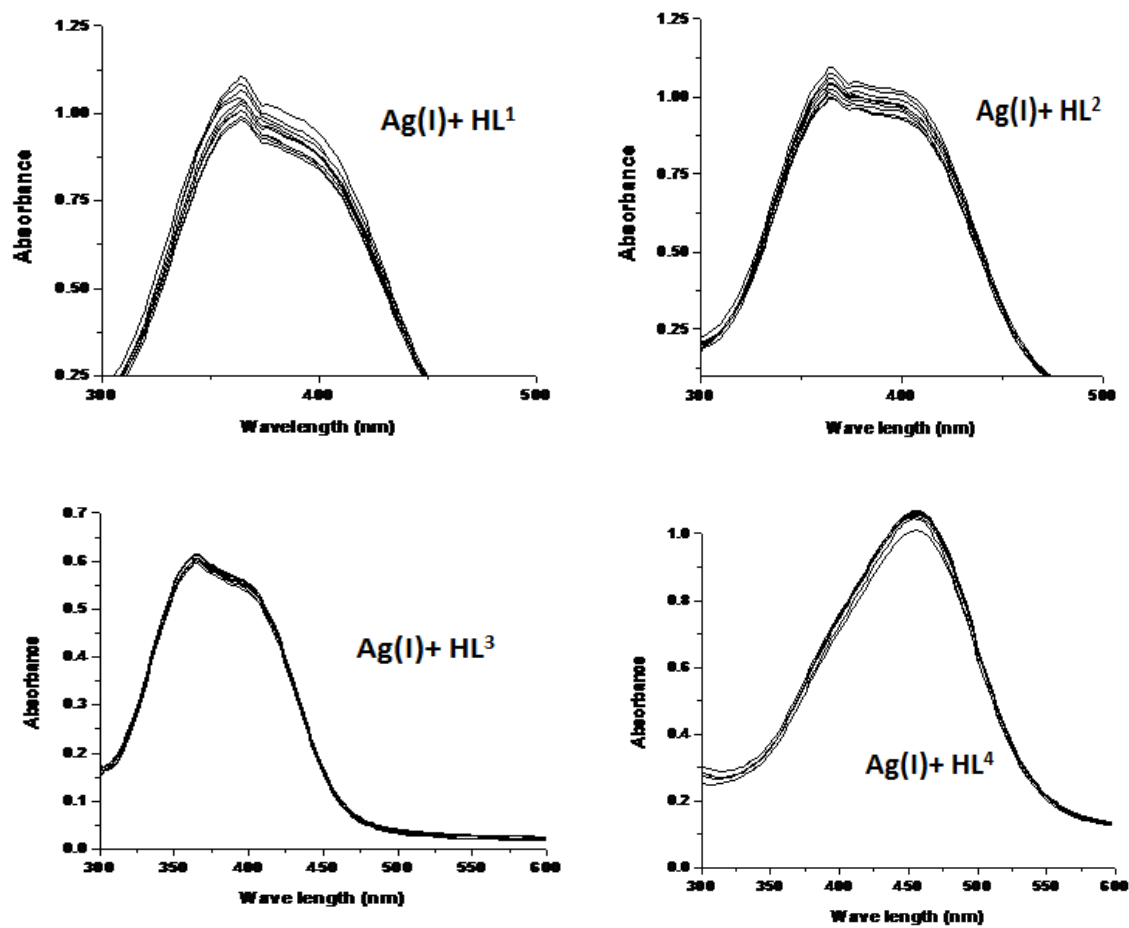

Figure 7S. Spectrophotometric plots for DNA binding towards Ag(I) complexes(1-4)

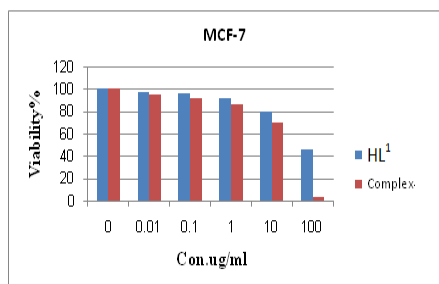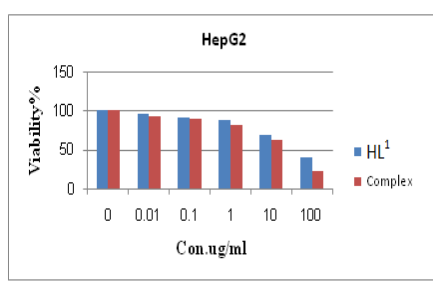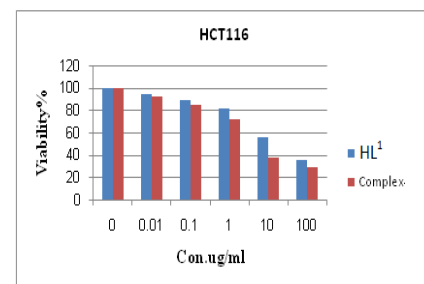

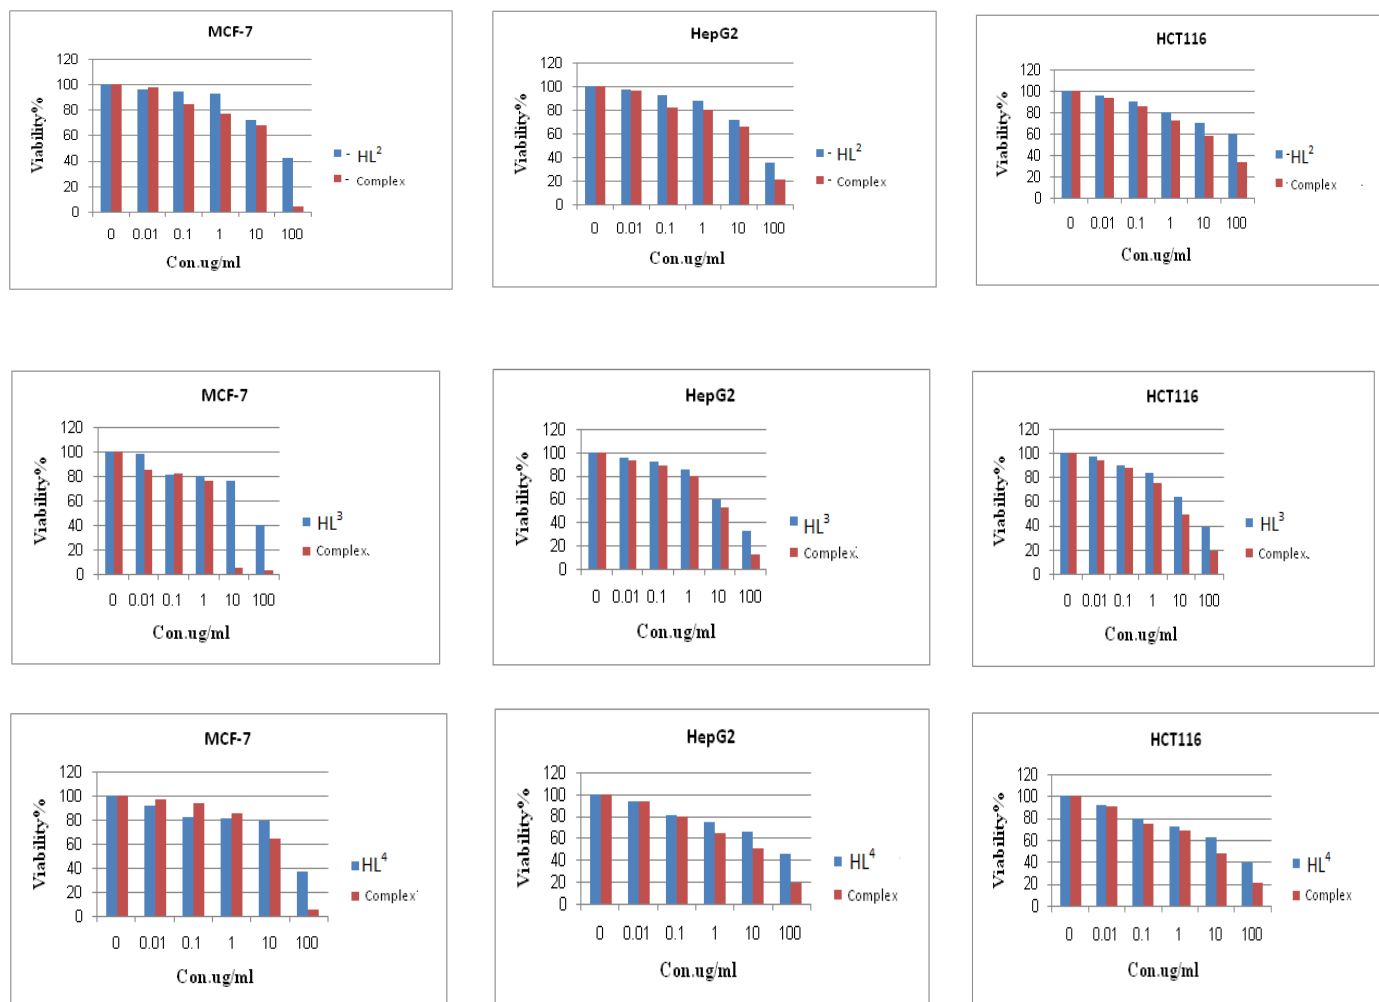

**Figure 8S .** Dose response curves of HL(1-4) ligands and their Ag(I) complexes against MCF-7, HEPG-2 and HCT-116 cancer cells, cells were treated with various concentrations of ligands and complexes incubated for 72 hrs. %5 CO<sub>2</sub>.

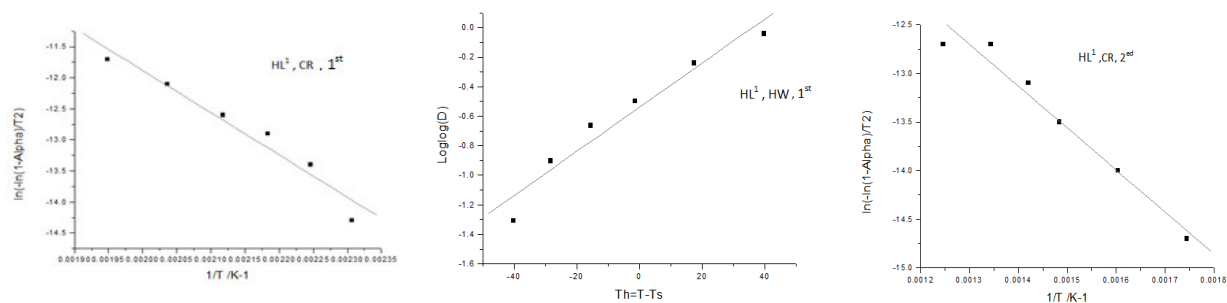

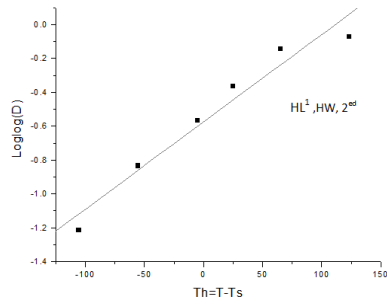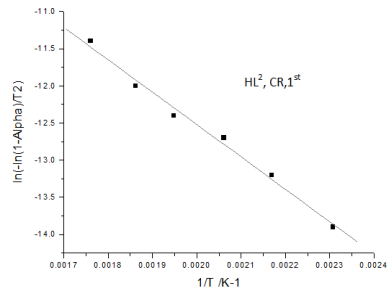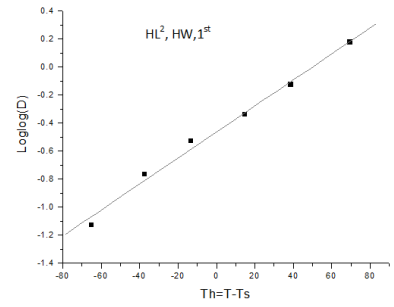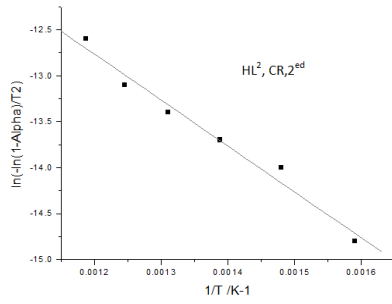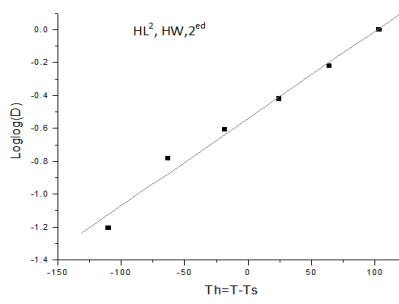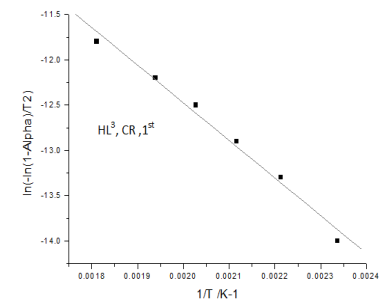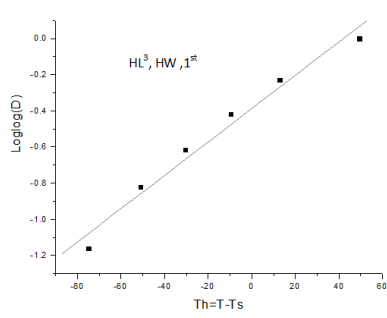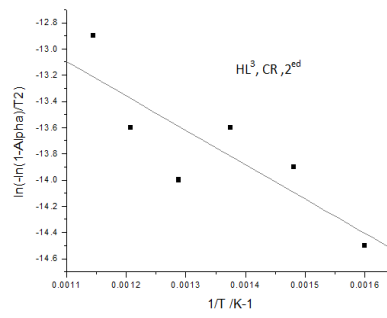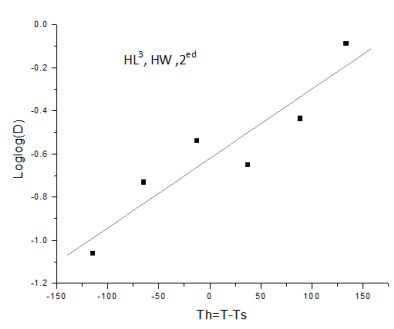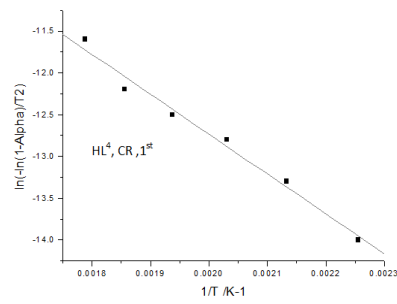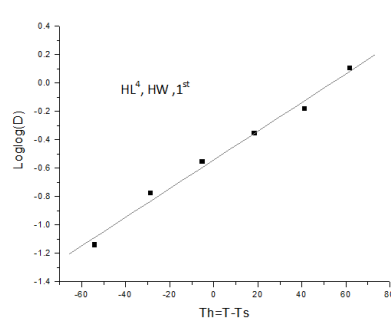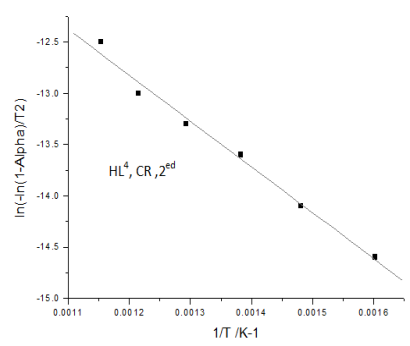

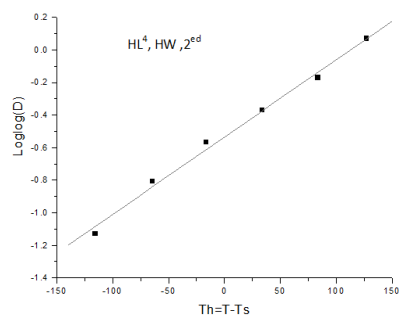

**Figure 9A,S.** kinetic plots using Coats Redfern and Horowitz-Metzger for pyrazolone liugands, HL(1-4)

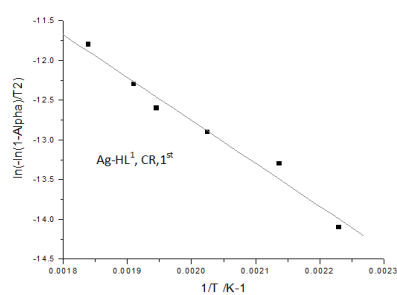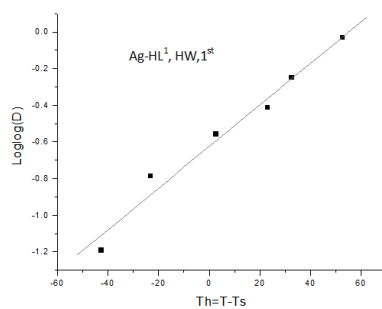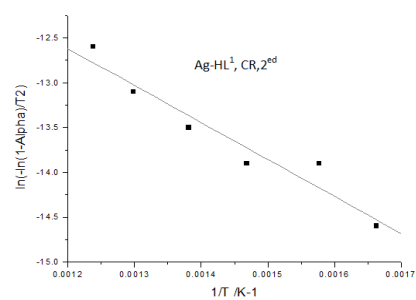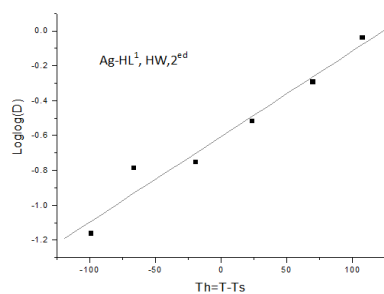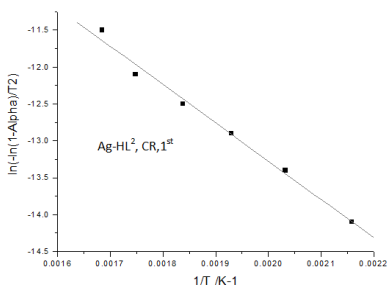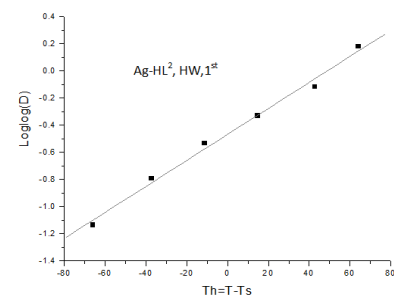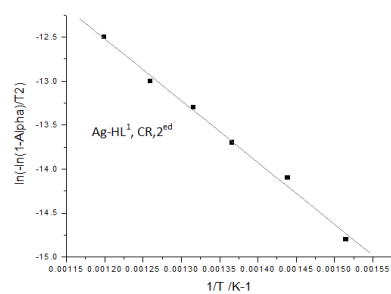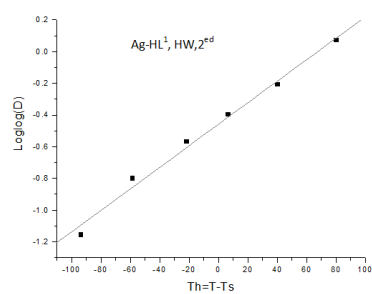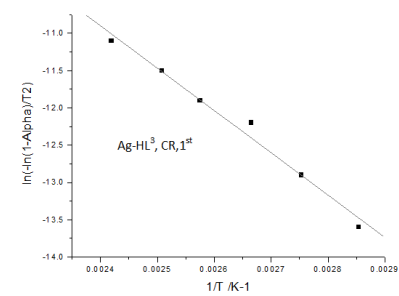

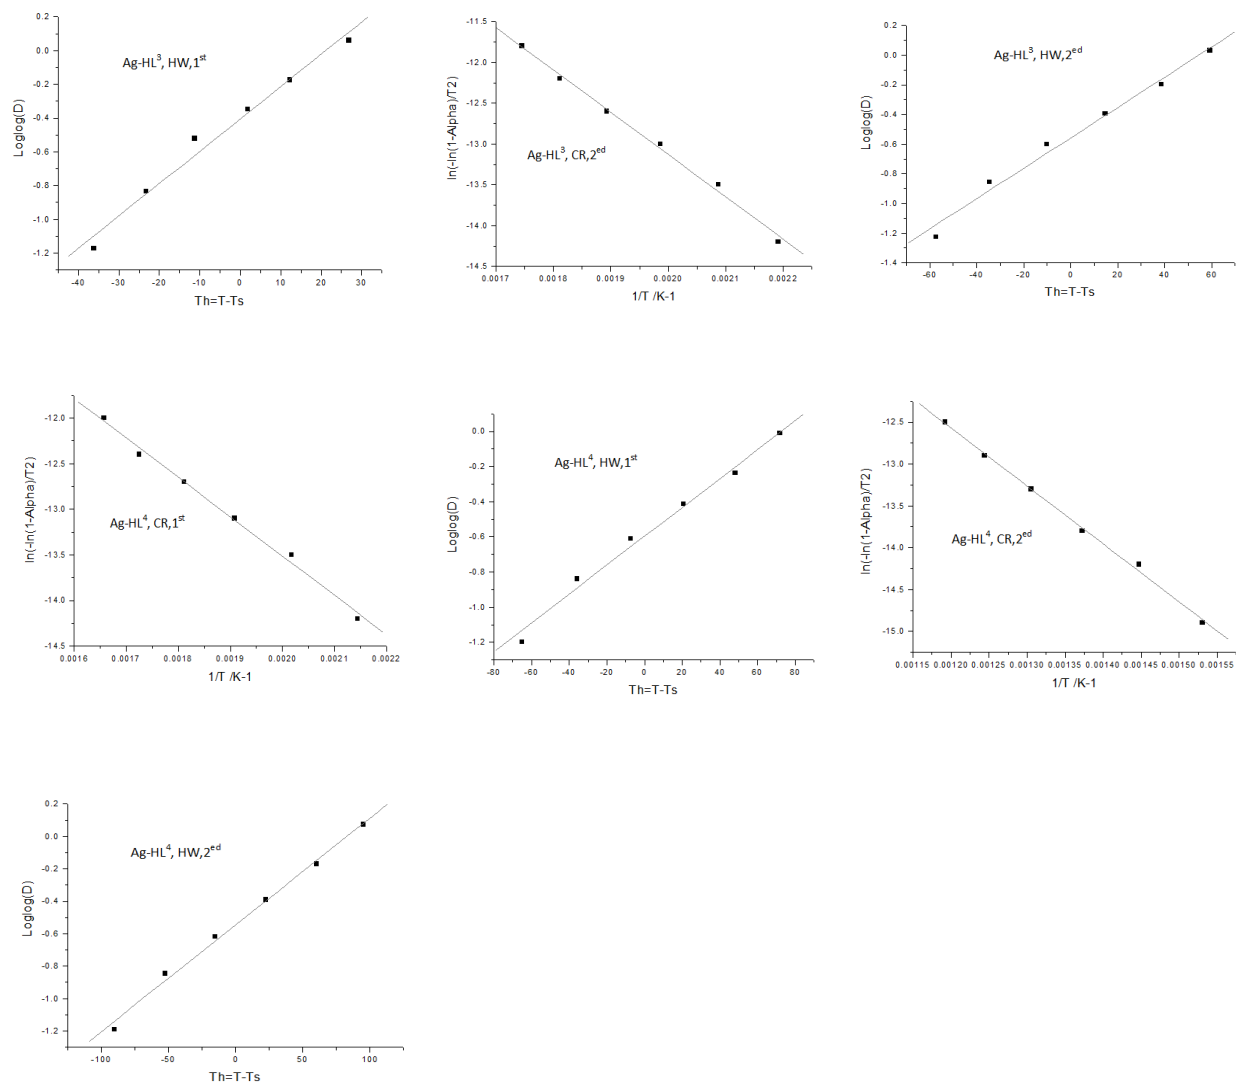

**Figure 9B, S.** kinetic plots using Coats Redfern and Horowitz-Metzger for pyrazolone- Ag(I) complexes

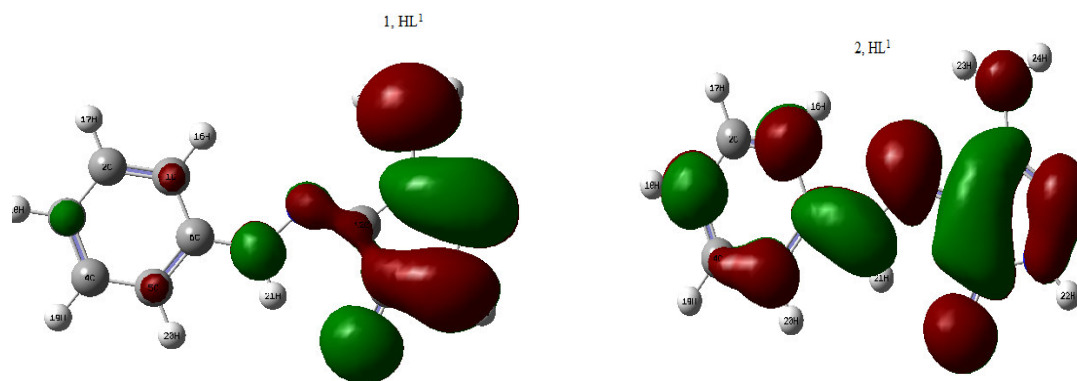

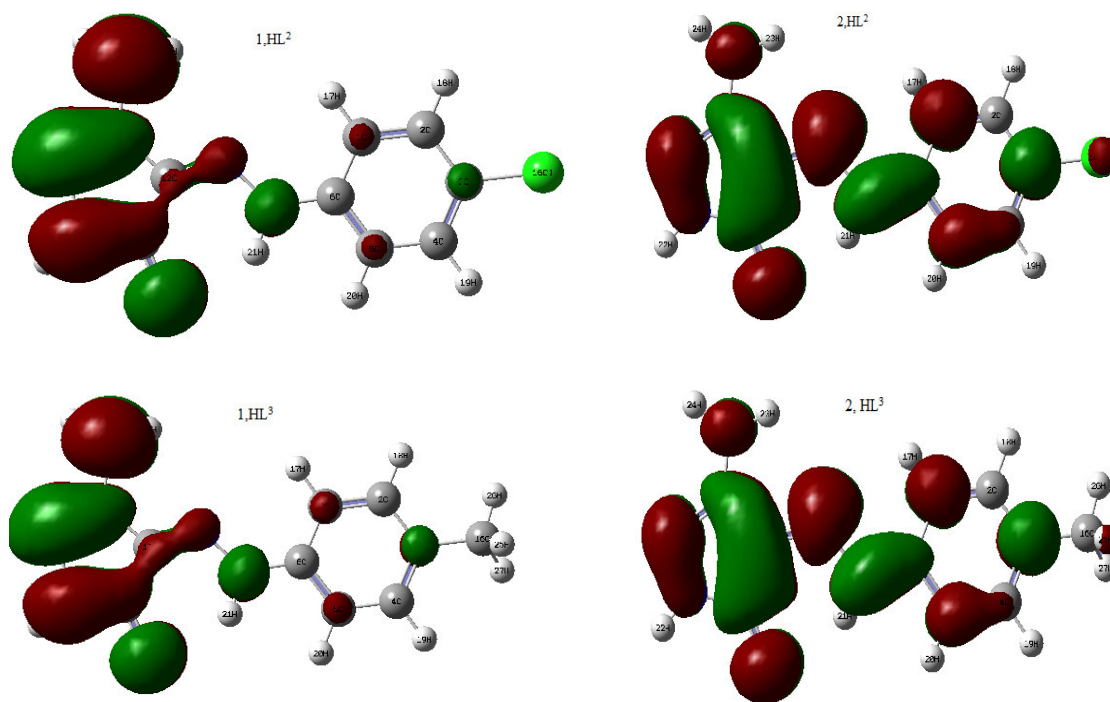

**Figure 10A, S.** Images of frontier molecular orbital's (HOMO,1 & LUMO,2 ) for pyrazolone ligands (HL<sup>1-3</sup> )

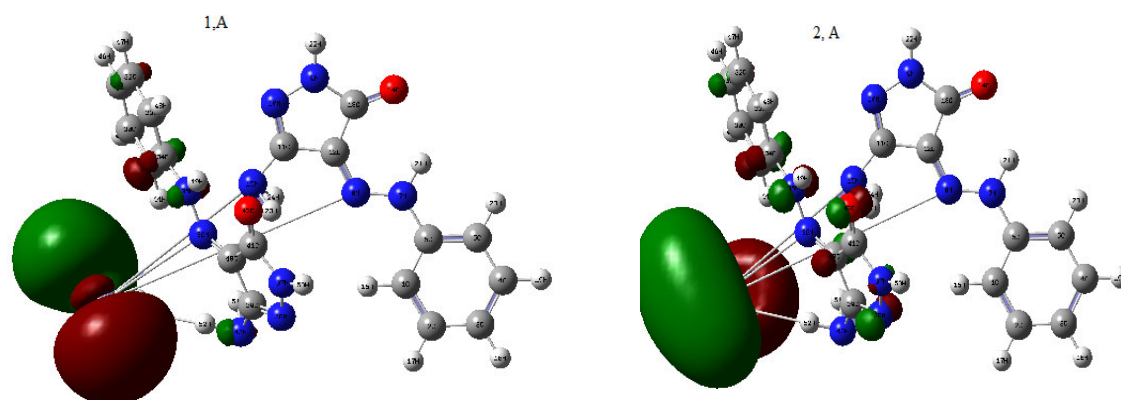



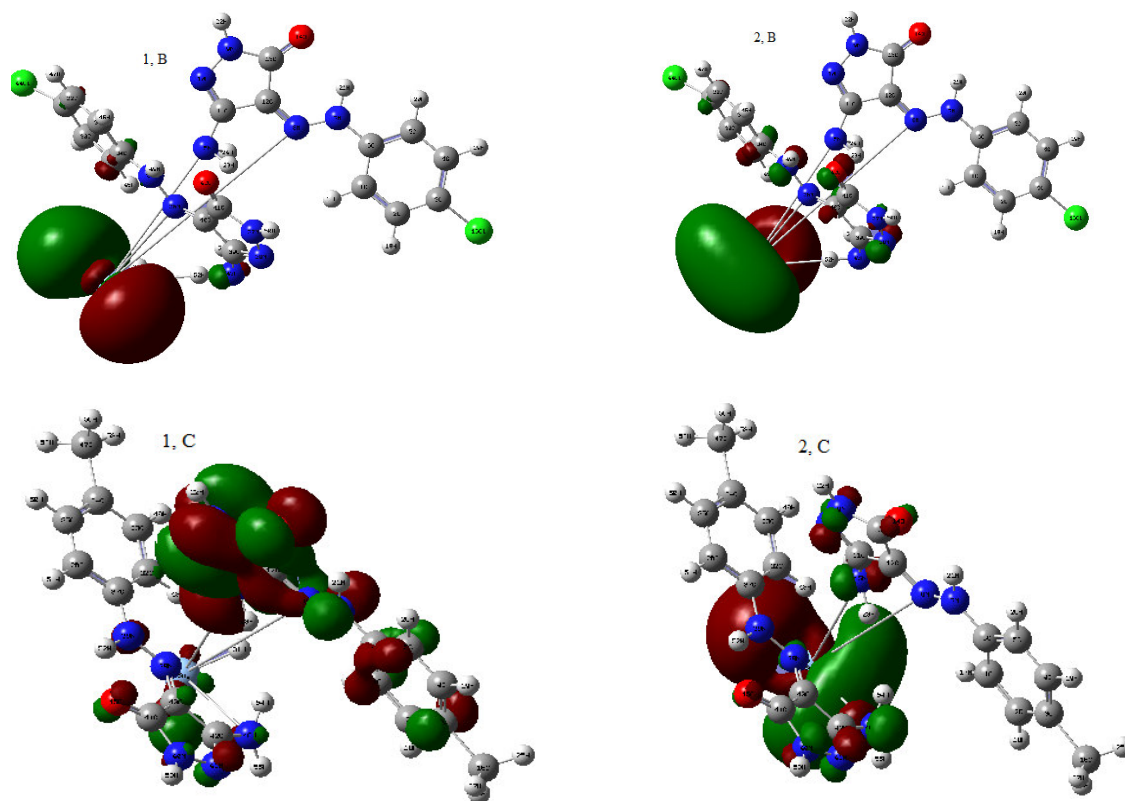

**Figure 10B, S.** Images of frontier molecular orbital's( HOMO,1 & LUMO,2) for Ag(I)-HL <sup>1-3</sup> complexes (A-c, respectively)

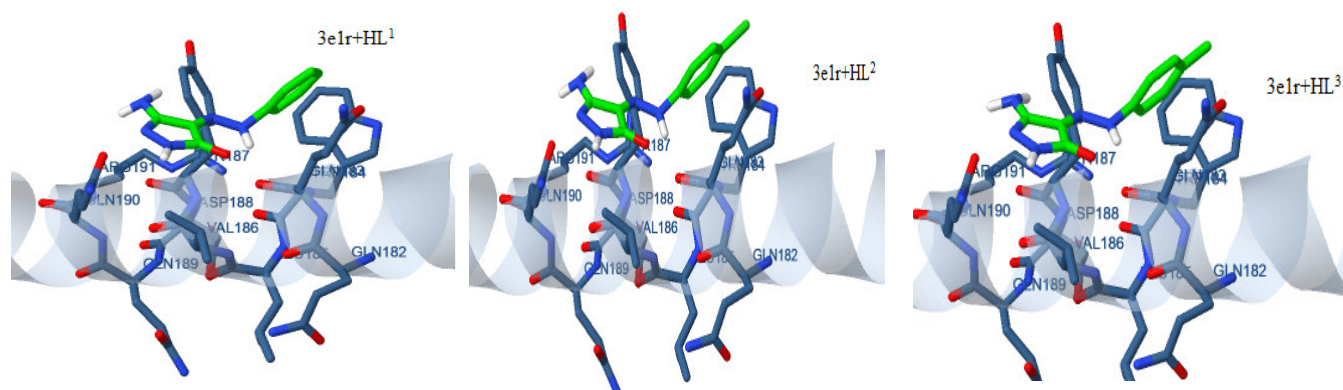





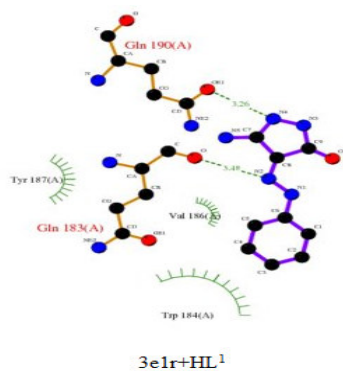

Key

- Ligand bond
- Non-ligand bond
- Hydrogen bond and its length

His 53 Non-ligand residues involved in other contact(s)

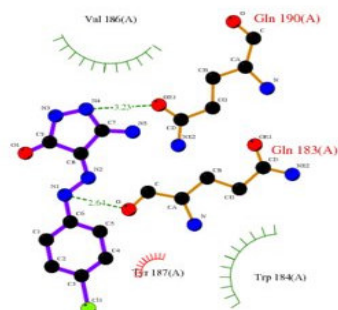

Key

- Ligand bond
- Non-ligand bond
- Hydrogen bond and its length

His 53 Non-ligand residues involved in other contact(s)

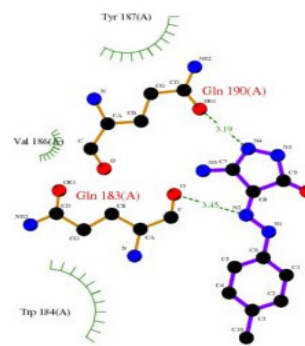

Key

- Ligand bond
- Non-ligand bond
- Hydrogen bond and its length

His 53 Non-ligand residues involved in other contact(s)

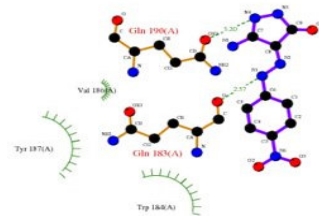

Key

- Ligand bond
- Non-ligand bond
- Hydrogen bond and its length

His 53 Non-ligand residues involved in other contact(s)

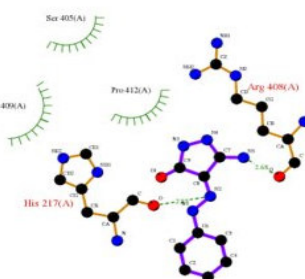

Key

- Ligand bond
- Non-ligand bond
- Hydrogen bond and its length

His 53 Non-ligand residues involved in other contact(s)

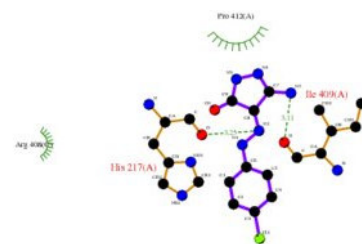

Key

- Ligand bond
- Non-ligand bond
- Hydrogen bond and its length

His 53 Non-ligand residues involved in other contact(s)

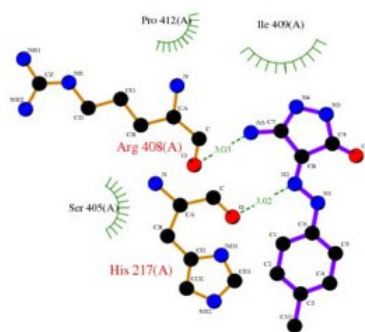

Key

- Ligand bond
- Non-ligand bond
- Hydrogen bond and its length

His 53 Non-ligand residues involved in other contact(s)

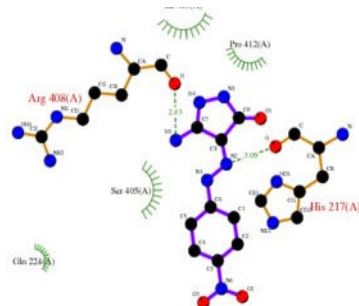

Key

- Ligand bond
- Non-ligand bond
- Hydrogen bond and its length

His 53 Non-ligand residues involved in other contact(s)

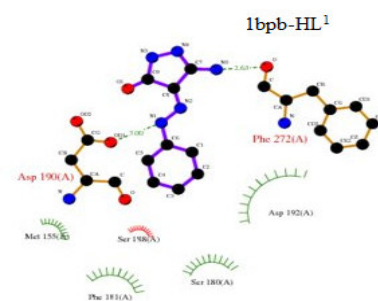

Key

- Ligand bond
- Non-ligand bond
- Hydrogen bond and its length

His 53 Non-ligand residues involved in other contact(s)

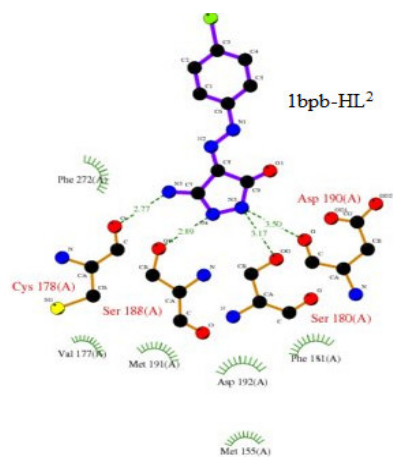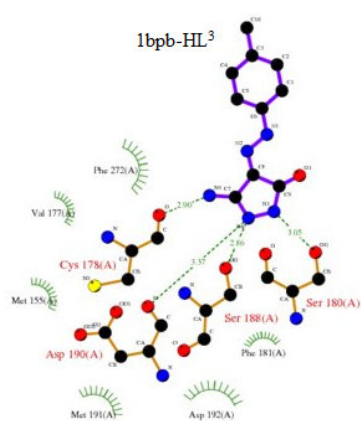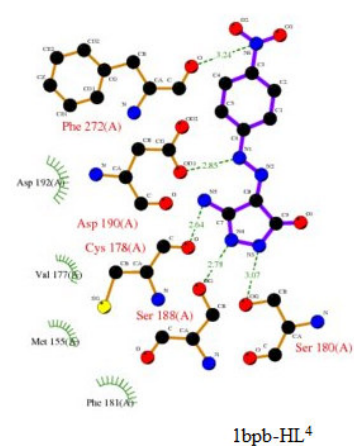

Key

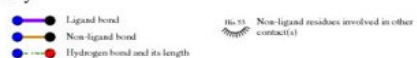

Key

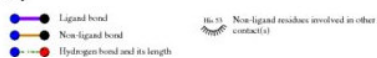

Key

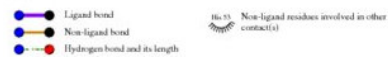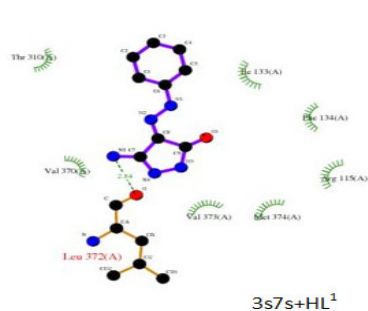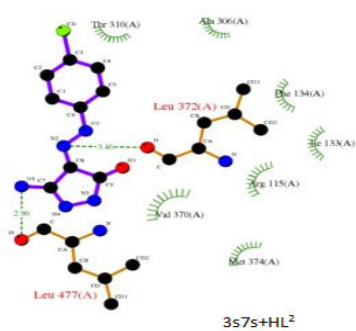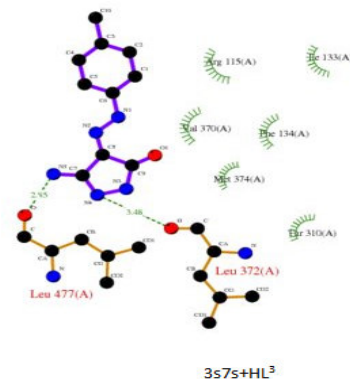

Key

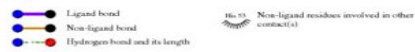

Key

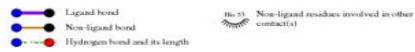

Key

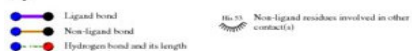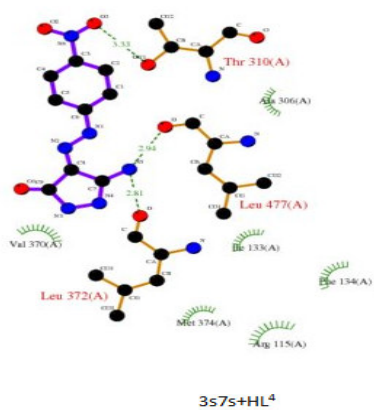

Key

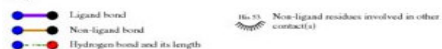

**Figure 12S** . 2D plots for interacting complexes appeared with 3e1r , 4dk7, 1bpb and 3s7s proteins and HL<sup>1-4</sup> ligands
